# Supplementary material for: Semi-automated socio-anthropologic analysis of the medical discourse on rheumatoid arthritis: potential impact in public health
Source: bioRxiv or medRxiv preprint supplement (doi:10.1101/2022.04.05.22273443), 2022-04-13
Supplement: Supplementary file [file media-2.pdf]

# Semi-automated socio-anthropologic analysis of the *medical discourse* on rheumatoid arthritis: potential impact in public health

## Supplementary Information

Christine Nardini<sup>1\*</sup>, Lucia Candelise<sup>2,3\*</sup>, Mauro Turrini<sup>4\*</sup>, Olga Addimanda<sup>5</sup>

<sup>1</sup> Consiglio Nazionale delle Ricerche, Istituto per le Applicazioni del Calcolo "Mauro Picone", Roma, IT

<sup>2</sup> ISS, Institut Sciences Sociales, Université de Lausanne, CH

<sup>3</sup> CEPED, Centre Population et Développement, Université de Paris, FR

<sup>4</sup> Institute of Public Goods and Policies (IPP), Spanish National Research Council (CSIC), Madrid - ES

<sup>5</sup> UOC Medicina Interna ad Indirizzo Reumatologico, Ospedale Maggiore, AUSL Bologna, IT

\*To whom correspondence should be addressed: [christine.nardini@cnr.it](mailto:christine.nardini@cnr.it), [lucia.candelise@unil.ch](mailto:lucia.candelise@unil.ch),  
[mauro.turrini@cchs.csic.es](mailto:mauro.turrini@cchs.csic.es)

**Key-words:** non-communicable diseases; non-pharmacological therapies; chronic inflammation; rheumatoid arthritis; health policy; medical socio-anthropology; machine learning; Sustainable Development Goals.

# Abstract

The debilitating effects of non-communicable diseases (NCDs) and the accompanying chronic inflammation, represent a significant obstacle for the sustainability of our development, with efforts being spread worldwide to contrast NCDs' diffusion, as per the United Nations Sustainable Development Goals (SDG 3). In fact, despite efforts of variable intensities in numerous directions (from innovations in biotechnology to lifestyle modifications), NCDs' incidence remains pandemic.

The present work wants to contribute to this major concern with a specific focus on the fragmentation of the medical approaches, via an interdisciplinary analysis of the *medical discourse*, i.e. the heterogenous reporting that biomedical scientific literature uses to describe the anti-inflammatory therapeutic landscape in NCDs. The aim is to better capture the roots of this compartmentalization and the power relations existing among three segregated *pharmacological*, *experimental* and *unstandardized* biomedical approaches, to ultimately empower collaboration beyond medical specialties and possibly untap a more ample and effective reservoir of integrated therapeutic opportunities.

Using as exemplar disease rheumatoid arthritis (RA), twenty-eight articles were manually translated each into a nine-dimensional categorical variable of medical socio-anthropological relevance, relating in particular (but not only) to *legitimacy*, *temporality* and *spatialization*. This digitalized picture (9 x 28 table) of the medical discourse was further analyzed by simple automatic learning approaches to identify differences and highlight commonalities among the biomedical categories.

Interpretation of these results gives original insights including the suggestion to: empower scientific communication between *unstandardized* approaches and basic biology; promote non-pharmacological therapies repurposing to enhance robustness of *experimental* approaches; align the spatial representation of diseases and therapies in *pharmacology* to effectively embrace the

*systemic* approach promoted by modern personalized and preventive medicines. We hope this original work may expand and foster interdisciplinarity among public health stakeholders, ultimately contributing to the achievement of SGD3.

### Literature additional filtering criteria

The queries on Pubmed were run on February 4<sup>th</sup> 2020. Before analyzing the articles selected by Pubmed MeSH search, additional filtering has been applied on titles alone in order to refine the selection. The first filtering is a semi-automatic step, the second is manual.

Semi-automatic filtering to remove the following items (color coded in Supplementary Table 1):

- Non RA: reviews not on RA
- Non english: articles in other languages
- Non appropriate: different topic
- Too specific: RA with specific comorbidity; case reports; non systemic approach to RA (i.e. specific joints only)
- Too general: relevant for RA also, but not specific to RA (green)
- Included: the article already falls in another category, we kept it in the most appropriate one
- Misclassified: belongs to another category, where it is not present (orange)
- Older version: when two versions are available we keep the most recent

Second manual curation:

- Identification title-wise of the most general articles, coherent with the subsection of interest. This, in particular for the most abundant category of drug therapy anti-inflammatory, leads to the arguable exclusion (*too specific*) of any article focusing on any broad subset of drugs (DMARDs, chemotherapics etc.)
- Identification where possible of time series (mostly *drug therapy anti-inflammatory; dietary supplement; anti-microbial*), the former for example traces back the evolution of therapy from the introduction of biologics onwards, and the latter morphs into the more general *gastrointestinal microbiome* upon discovery of its relevance in autoimmunity.
- Filtering by availability (availability of the online article in general, and open access afterwards)
- Cochrane reviews are preferred when offered by PubMed ranking by all above criteria.
- Control on specific bias: There exist ample controversy against the usage of sham acupuncture as a mean to include blinding in random control trials (RCT) for acupuncture [1,2]. Opponent to this forceful blinding claim that all points on the body surface are to some extent sensitive to the needle stimulation and therefore comparison

is meaningless/inappropriate. Beyond the controversy, there exist internationally standardized [3] statistical design to model situations where placebo is not possible (this, incidentally, includes degenerative diseases like RA is): *non-inferiority clinical trials*, that compare the gold standard (pharmacological therapy in this case) with the same therapy plus an additional approach, acupuncture in this case. Given that the two automatically selected papers [4] and [5] include sham acupuncture and/or exclude non-inferiority trials, to offer a more complete analysis of the medical discourse we added the article by Wang et al. [6] published on the same year as [5] and analyzing the same data (7 out of 8 total trials are the same), including active control trials and analyzing them separately from RCT.

## Data representation

### Digitalized Medical Discourse

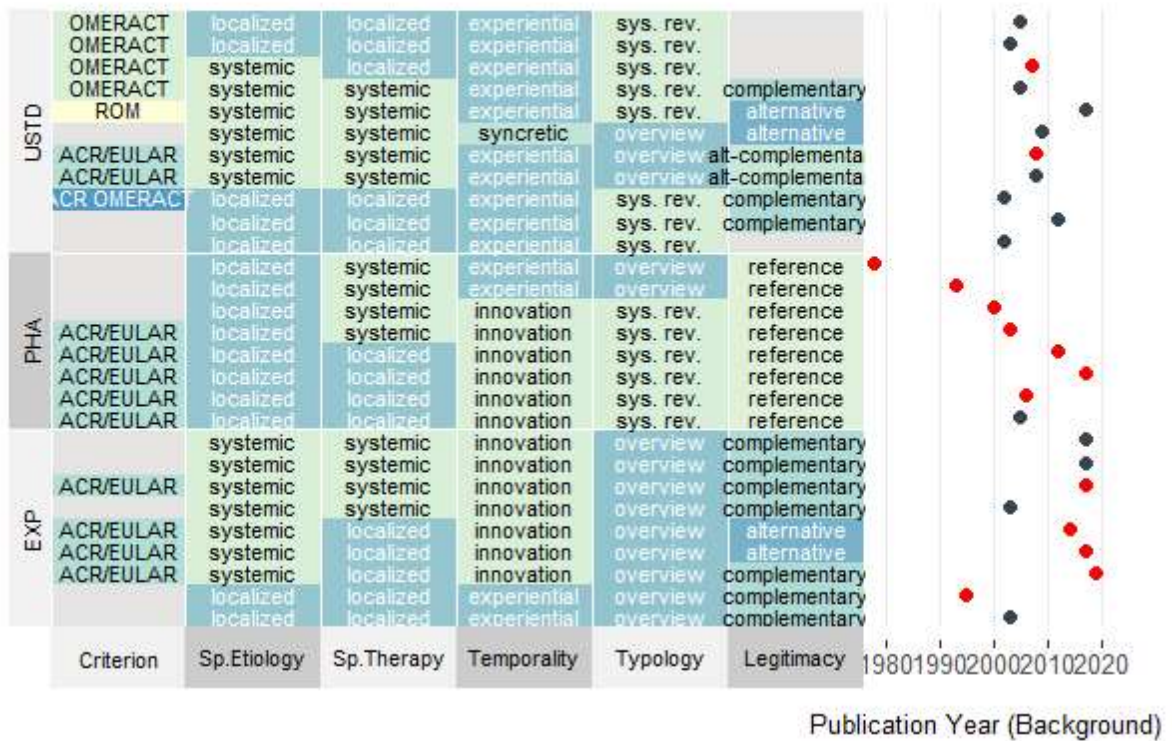

**Figure S1** Representation of the digitalized medical discourse in a heatmap, emphasizing socio-anthropological variables, versus biomedical categories. Colors are only used to distinguish elements, with no other meaning, their values is directly labeled in the cells of the table. Light gray values are NA. Adjacent plot represents the corresponding Publication Year. Dots in red represent main authors' Background in rheumatology, in black everything else. Geography is omitted given the relatively uninformative content (Eurocentric). The

*majority of Rheumatologists in PHA versus the two other categories is visually clear, as is the extent of the temporal articles distribution.*

## **Bibliography**

1. Lundeberg T, Lund I, Sing A, Naslund J. Is placebo acupuncture what it is intended to be? Evidence-based complementary and alternative medicine : eCAM. 2011;2011: 932407. doi:10.1093/ecam/nep049
2. Lundeberg T, Lund I, Näslund J, Thomas M. The Emperors sham - wrong assumption that sham needling is sham. *Acupunct Med*. 2008;26: 239–242. doi:10.1136/aim.26.4.239
3. International Conference on Harmonisation of technical requirements for registration of pharmaceuticals for human use. ICH harmonized tripartite guideline: Guideline for Good Clinical Practice. *J Postgrad Med*. 2001;47: 45–50.
4. Casimiro L, Barnsley L, Brosseau L, Milne S, Robinson VA, Tugwell P, et al. Acupuncture and electroacupuncture for the treatment of rheumatoid arthritis. The Cochrane database of systematic reviews. 2005; Cd003788. doi:10.1002/14651858.CD003788.pub2
5. Lee MS, Shin B-C, Ernst E. Acupuncture for rheumatoid arthritis: a systematic review. *Rheumatology (Oxford)*. 2008;47: 1747–1753. doi:10.1093/rheumatology/ken330
6. Wang C, de Pablo P, Chen X, Schmid C, McAlindon T. Acupuncture for pain relief in patients with rheumatoid arthritis: a systematic review. *Arthritis Rheum*. 2008;59: 1249–1256. doi:10.1002/art.24009
